# Supplementary material for: Solid–gas synthesis of stable V3S4 nanoflakes: electrochemical characterization as a Li-ion battery anode
Source: Royal Society of Chemistry journal article supplement (doi:10.1039/d3nj03633b), 2024-01-01
Supplement: d3nj03633b1.pdf [file d3nj03633b1.pdf]

## Supporting Information

### **Solid-gas synthesis of stable V<sub>3</sub>S<sub>4</sub> nanoflakes: electrochemical characterization as Li-ion battery anode**

Balla Rekha Madhuri<sup>ϕ,1</sup>, Harish Kumar Adigilli<sup>ϕ,1</sup>, Anirudha Karati<sup>1</sup>, Joydip Joardar<sup>1</sup>, R. Vijay<sup>1</sup>, Tata Narasinga Rao<sup>1</sup> and Ramkrishna Sahoo<sup>1,2\*</sup>

<sup>1</sup>Centre for Nanomaterials, International Advanced Research Centre for Powder Metallurgy and New Materials (ARCI), Hyderabad, Telangana, India.

<sup>2</sup>Department of Science and Technology, Ministry of Science and Technology, New Delhi, India

*ϕB. R. Madhuri and H. K. Adigilli have made equal contribution to the paper.*

Corresponding Author: [sahooramkrishna2010@gmail.com](mailto:sahooramkrishna2010@gmail.com) (Dr. Ramkrishna Sahoo)

### Materials:

All the chemicals used in this work were of AR grade. Vanadium oxide ( $V_2O_5$ ) powder was purchased from Sigma-Aldrich with 99.95% purity. Ammonium sulfide solution of 20 wt% and Sulfur powder with 98% purity were purchased from Loba chemicals. The electrolyte solution was bought from the Sigma-Aldrich and the Whatman glass microfiber (GF/D) was used as the separator.

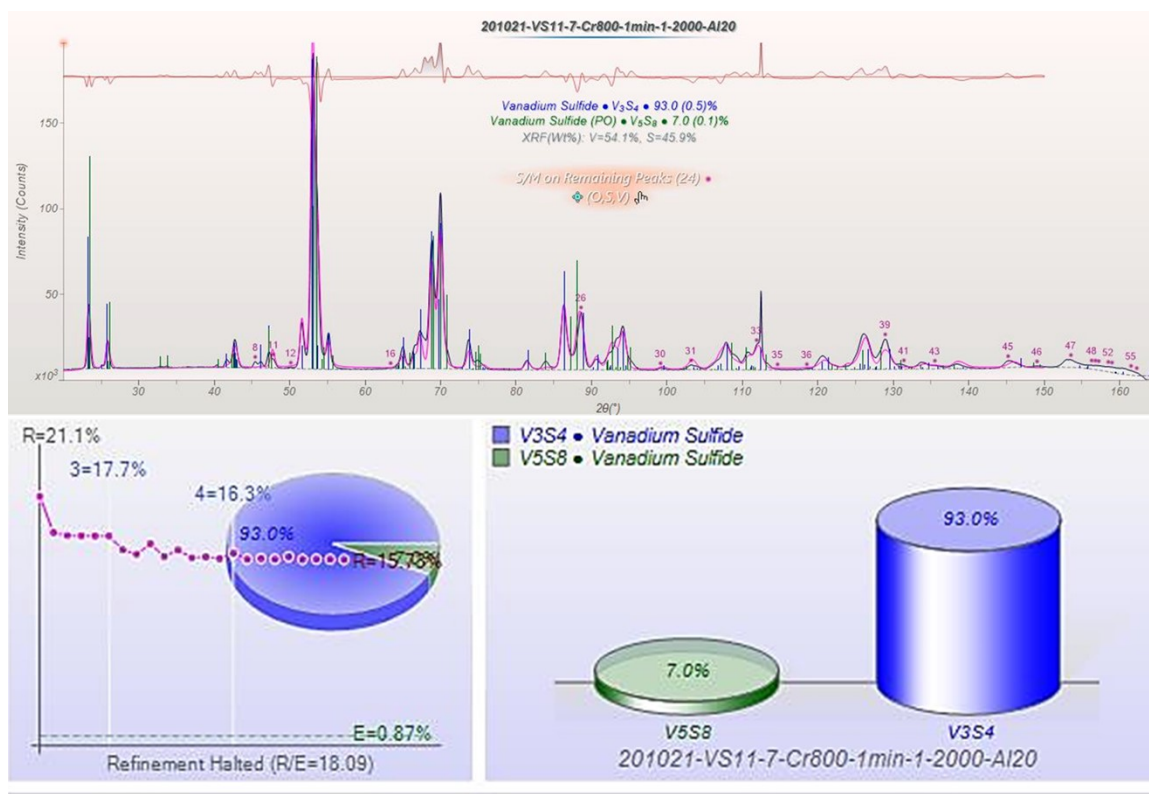

**Figure S1:** Rietveld refinement of vanadium sulfide (from Fig.1a in the manuscript).

Rietveld analysis carried out using MDI JADE PRO, revealed the phase fraction of  $V_3S_4$  and  $V_5S_8$  are around 93 wt.%, and wt.7% respectively. There were no vanadium oxide phase peaks found to be present from Rietveld refinement.

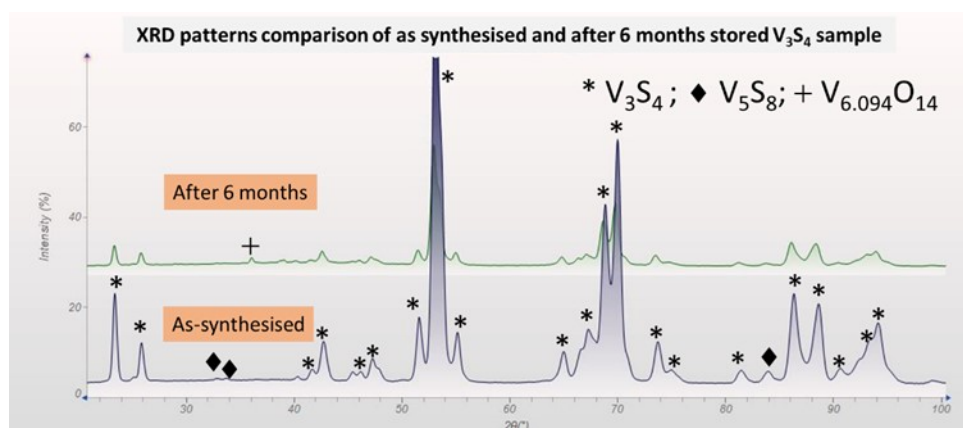

**Figure S2:** Comparative XRD plot of the as-prepared  $V_3S_4$  (as-prepared and after six months exposure in air).

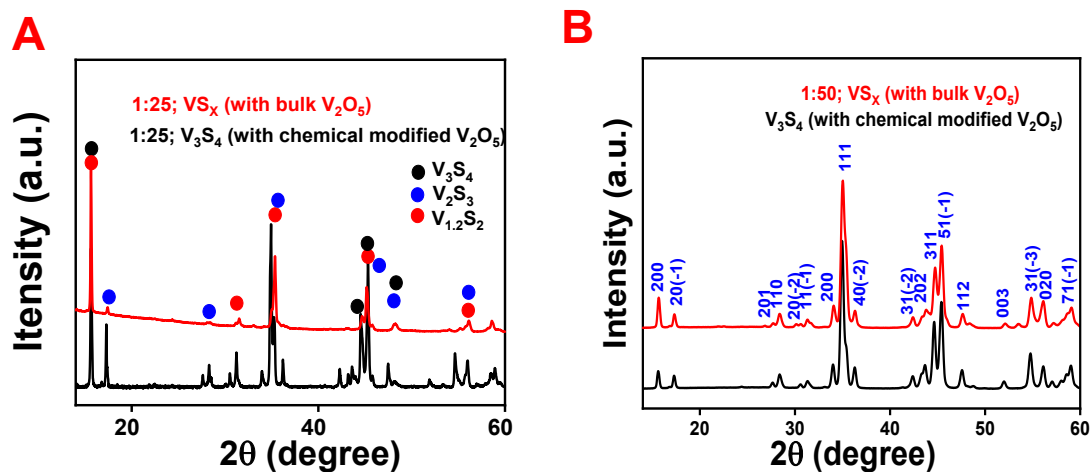

**Figure S3:** Comparative XRD profile of vanadium sulfide prepared from chemical modified V<sub>2</sub>O<sub>5</sub> and ball milled V<sub>2</sub>O<sub>5</sub> with different sulfur powder (A) 1:25 and (B) 1:50.

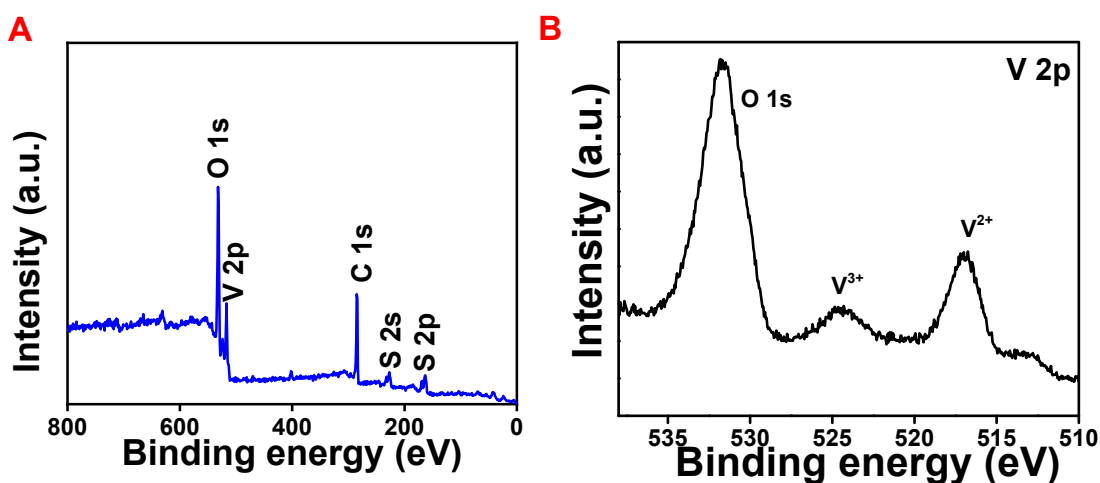

**Figure S4:** X-ray photoelectron spectroscopy (XPS) of the as-prepared V<sub>3</sub>S<sub>4</sub> nanoflakes; (A) wide range spectrum and (B) narrow range V 2p with O 1s spectra.

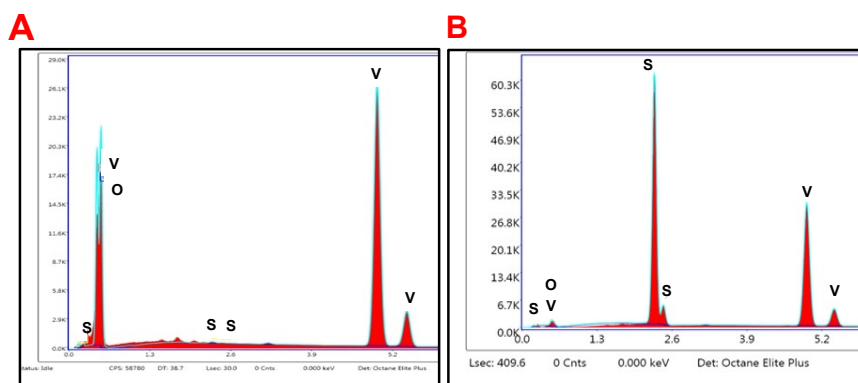

**Figure S5:** EDS spectra of (A) chemically modified product and (V) V<sub>3</sub>S<sub>4</sub> nanoflakes.

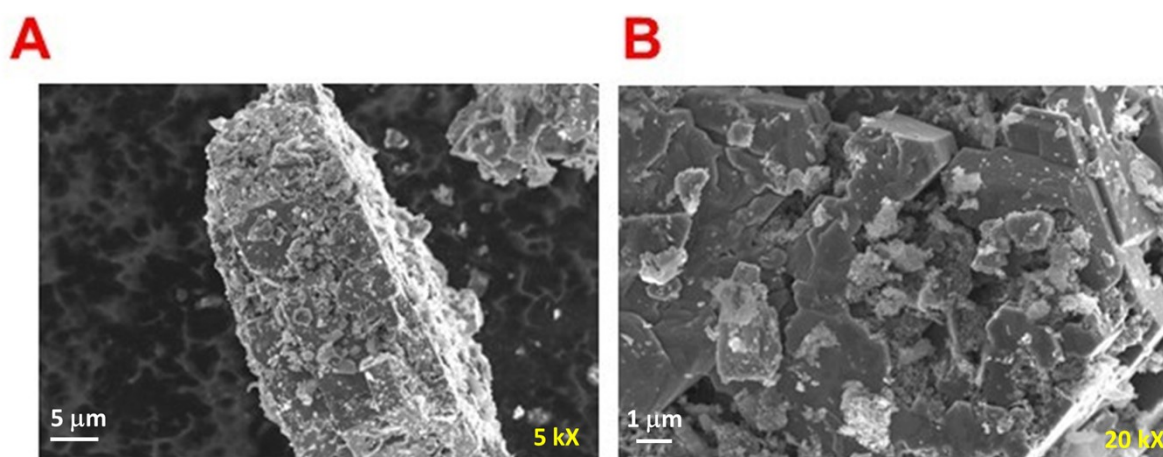

**Figure S6:** The FESEM image of the vanadium sulfide sample prepared by ball-milled V<sub>2</sub>O<sub>5</sub> precursor (without chemical modification).

**Table S1:** Various synthesis strategies and comparative specific capacity values of the different V<sub>3</sub>S<sub>4</sub> and its composite.

| Materials                                  | Synthesis strategy                 | Precursors and synthesis parameters                                                                              | Specific capacity (mA h g <sup>-1</sup> ) at specific current (mA g <sup>-1</sup> ) as LIB anode | Ref. |
|--------------------------------------------|------------------------------------|------------------------------------------------------------------------------------------------------------------|--------------------------------------------------------------------------------------------------|------|
| V <sub>3</sub> S <sub>4</sub> -3D graphene | Hydrothermal followed by annealing | <b>Hydrothermal:</b> ammonium vanadate and ammonia<br><b>Sulfidation:</b> H <sub>2</sub> S gas and Argon, 900 °C | 1165 at 0.07                                                                                     | S1   |

|                                             |                                                 |                                                                                                                                                                |              |                  |
|---------------------------------------------|-------------------------------------------------|----------------------------------------------------------------------------------------------------------------------------------------------------------------|--------------|------------------|
| V <sub>3</sub> S <sub>4</sub> @C nanosheets | Hydrothermal followed by sulfidation            | Hydrothermal: V <sub>2</sub> O <sub>5</sub> powder, 1, 4-benzenedicarboxylic acid and ascorbic acid<br><b>Sulfidation:</b> thioacetamide, nitrogen gas, 500 °C | 1065 at 0.1  | S2               |
| V <sub>3</sub> S <sub>4</sub> /carbon       | Electrospinning followed by thermal sulfidation | <b>Electrospinning:</b> vanadium(V)oxytriisopropoxide and Polyvinyl acetate<br><b>Sulfidation:</b> sulfur, argon and hydrogen gas, 800 °C                      | 790 at 0.01  | S3               |
| V <sub>3</sub> S <sub>4</sub> /N,S-GO       | Hydrothermal followed by annealing              | Hydrothermal: NH <sub>4</sub> VO <sub>3</sub> and (NH <sub>2</sub> ) <sub>2</sub> CS, graphene oxides<br><b>Sulfidation:</b> Argon gas, 600 °C                 | 1150 at 0.05 | S4               |
| V <sub>3</sub> S <sub>4</sub> nanoflakes    | Hydrothermal followed by solid-gas reaction     | Hydrothermal: V <sub>2</sub> O <sub>5</sub> powder, (NH <sub>4</sub> ) <sub>2</sub> S<br><b>Sulfidation:</b> sulfur and hydrogen gas, 500 °C                   | 781 at 0.025 | <b>This work</b> |

### References:

- S1 Q. Liu, W. Yao, L. Zhan, Y. Wang and Y. A. Zhu, *Electrochim. Acta*, 2018, **261**, 35–41.
- S2 Y. Liu, Z. Sun, X. Sun, Y. Lin, K. Tan, J. Sun, L. Liang, L. Hou and C. Yuan, *Angew. Chemie Int. Ed.*, 2020, **59**, 2473–2482.
- S3 S. Husmann, Ö. Budak, A. Quade, A. Frank, A. Kruth, C. Scheu, A. Tolosa and V. Presser, *J. Power Sources*, 2020, **450**, 227674.
- S4 N. Wu, D. Miao, X. Zhou, L. Zhang, G. Liu, D. Guo and X. Liu, *Nanomaterials*, 2019, **9**, 1638.
